# Supplementary material
Source: publisher figshare collection journal article supplement (https://tandf.figshare.com/articles/dataset/_/9724148)
Supplement: Supplementary file 1 [file 1]

Archive with 2 entries (2 files):
- icts_a_1620223_sm9235.pdf
- icts_a_1620223_sm9227.jpg
