# Supplementary material
Source: publisher figshare collection journal article supplement (https://tandf.figshare.com/articles/dataset/_/9724148)
Supplement: Supplementary file 1 [file 1 › icts_a_1620223_sm9235.pdf]

**Supplemental Table 1. Histological Scores.**

Cartilage collagen matrix loss and osteophytes were not found in any histological image; therefore, these measures were not included in the table. Other values are shown as mean +/- 95% confidence interval (C.I.). Comparison for MIA versus saline animals at each week are from the Tukey HSD test, whereas the comparison for MIA and saline animals for all weeks is the p-value associated with the ANOVA main effect.

| Measure                                                                              | MIA-injected knee<br>Mean $\pm$ 95% C.I.                                                 | Saline-injected knee<br>Mean $\pm$ 95% C.I.                                              | p-value<br>(MIA/Saline)                                   |
|--------------------------------------------------------------------------------------|------------------------------------------------------------------------------------------|------------------------------------------------------------------------------------------|-----------------------------------------------------------|
| Cartilage degeneration<br>score on the medial third<br>of the medial<br>compartment  | W1: 0.16–1.20–2.24<br>W2: 0.04–0.83–1.62<br>W4: 0.12–1.00–1.88<br>All: 0.61–1.00–1.39    | W1: 0.00–0.00–0.00<br>W2: -0.28–0.40–1.08<br>W4: 0.00–0.00–0.00<br>All: -0.06–0.13–0.31  | **W1: 0.0240<br>W2: 0.8195<br>W4: 0.1068<br>**All: 0.0003 |
| Cartilage degeneration<br>score on the central third<br>of the medial<br>compartment | W1: -0.36–0.20–0.76<br>W2: -0.21–0.33–0.88<br>W4: -0.36–0.20–0.76<br>All: 0.01–0.25–0.49 | W1: 0.00–0.00–0.00<br>W2: 0.00–0.00–0.00<br>W4: 0.00–0.00–0.00<br>All: 0.00–0.00–0.00    | W1: 0.9192<br>W2: 0.5818<br>W4: 0.9319<br>All: 0.0505     |
| Cartilage degeneration<br>score on the lateral third<br>of the medial<br>compartment | W1: -0.24–1.00–2.24<br>W2: 0.00–0.00–0.00<br>W4: 0.29–1.40–2.51<br>All: 0.25–0.75–1.25   | W1: -0.26–0.17–0.60<br>W2: 0.00–0.00–0.00<br>W4: -0.28–0.40–1.08<br>All: -0.03–0.19–0.40 | W1: 0.2264<br>W2: 1.000<br>W4: 0.1201<br>**All: 0.0077    |
| Calcified cartilage and<br>subchondral bone<br>damage score                          | W1: 0.12–1.00–1.88<br>W2: 0.65–1.20–1.76<br>W4: 0.25–0.80–1.36                           | W1: -0.08–0.50–1.07<br>W2: -0.05–0.75–1.55<br>W4: 0.00–0.00–0.00                         | W1: 0.5618<br>W2: 0.7502<br>W4: 0.1461                    |

|                                                                                       |                     |                     |                |
|---------------------------------------------------------------------------------------|---------------------|---------------------|----------------|
|                                                                                       | All: 0.70–1.00–1.30 | All: 0.12–0.40–0.68 | **All: 0.0038  |
| Synovial reaction score                                                               | W1: 2.99–4.33–5.57  | W1: -0.02–0.39–0.80 | **W1: 0.0002   |
|                                                                                       | W2: 2.05–3.44–4.84  | W2: -0.39–0.80–1.99 | **W2: 0.0002   |
|                                                                                       | W4: 2.72–3.80–4.88  | W4: -0.09–0.53–1.16 | **W4: 0.0002   |
|                                                                                       | All: 3.24–3.83–4.43 | All: 0.23–0.56–0.90 | **All: <0.0001 |
| Medial joint capsule<br>repair (μm)                                                   | W1: 352–396–439     | W1: 251–301–351     | **W1: 0.0222   |
|                                                                                       | W2: 406–430–454     | W2: 255–317–379     | **W2: 0.0043   |
|                                                                                       | W4: 399–495–591     | W4: 307–325–343     | **W4: 0.0002   |
|                                                                                       | All: 407–440–472    | All: 292–314–335    | **All: <0.0001 |
| Growth plate thickness<br>under the medial half of<br>the medial compartment<br>(μm)  | W1: 145–154–163     | W1: 159–173–188     | W1: 0.1912     |
|                                                                                       | W2: 129–140–150     | W2: 120–138–156     | W2: 1.0000     |
|                                                                                       | W4: 137–152–167     | W4: 133–147–160     | W4: 0.5956     |
|                                                                                       | All: 141–148–154    | All: 146–155–164    | All: 0.3266    |
| Growth plate thickness<br>under the lateral half of<br>the medial compartment<br>(μm) | W1: 112–127–142     | W1: 140–154–168     | **W1: 0.0063   |
|                                                                                       | W2: 107–115–122     | W2: 99–114–130      | W2: 1.0000     |
|                                                                                       | W4: 115–125–134     | W4: 125–137–149     | W4: 0.9927     |
|                                                                                       | All: 116–122–128    | All: 129–138–146    | **All: 0.0036  |

8

9
