# Supplementary material
Source: publisher figshare collection journal article supplement (https://tandf.figshare.com/articles/dataset/_/9724148)

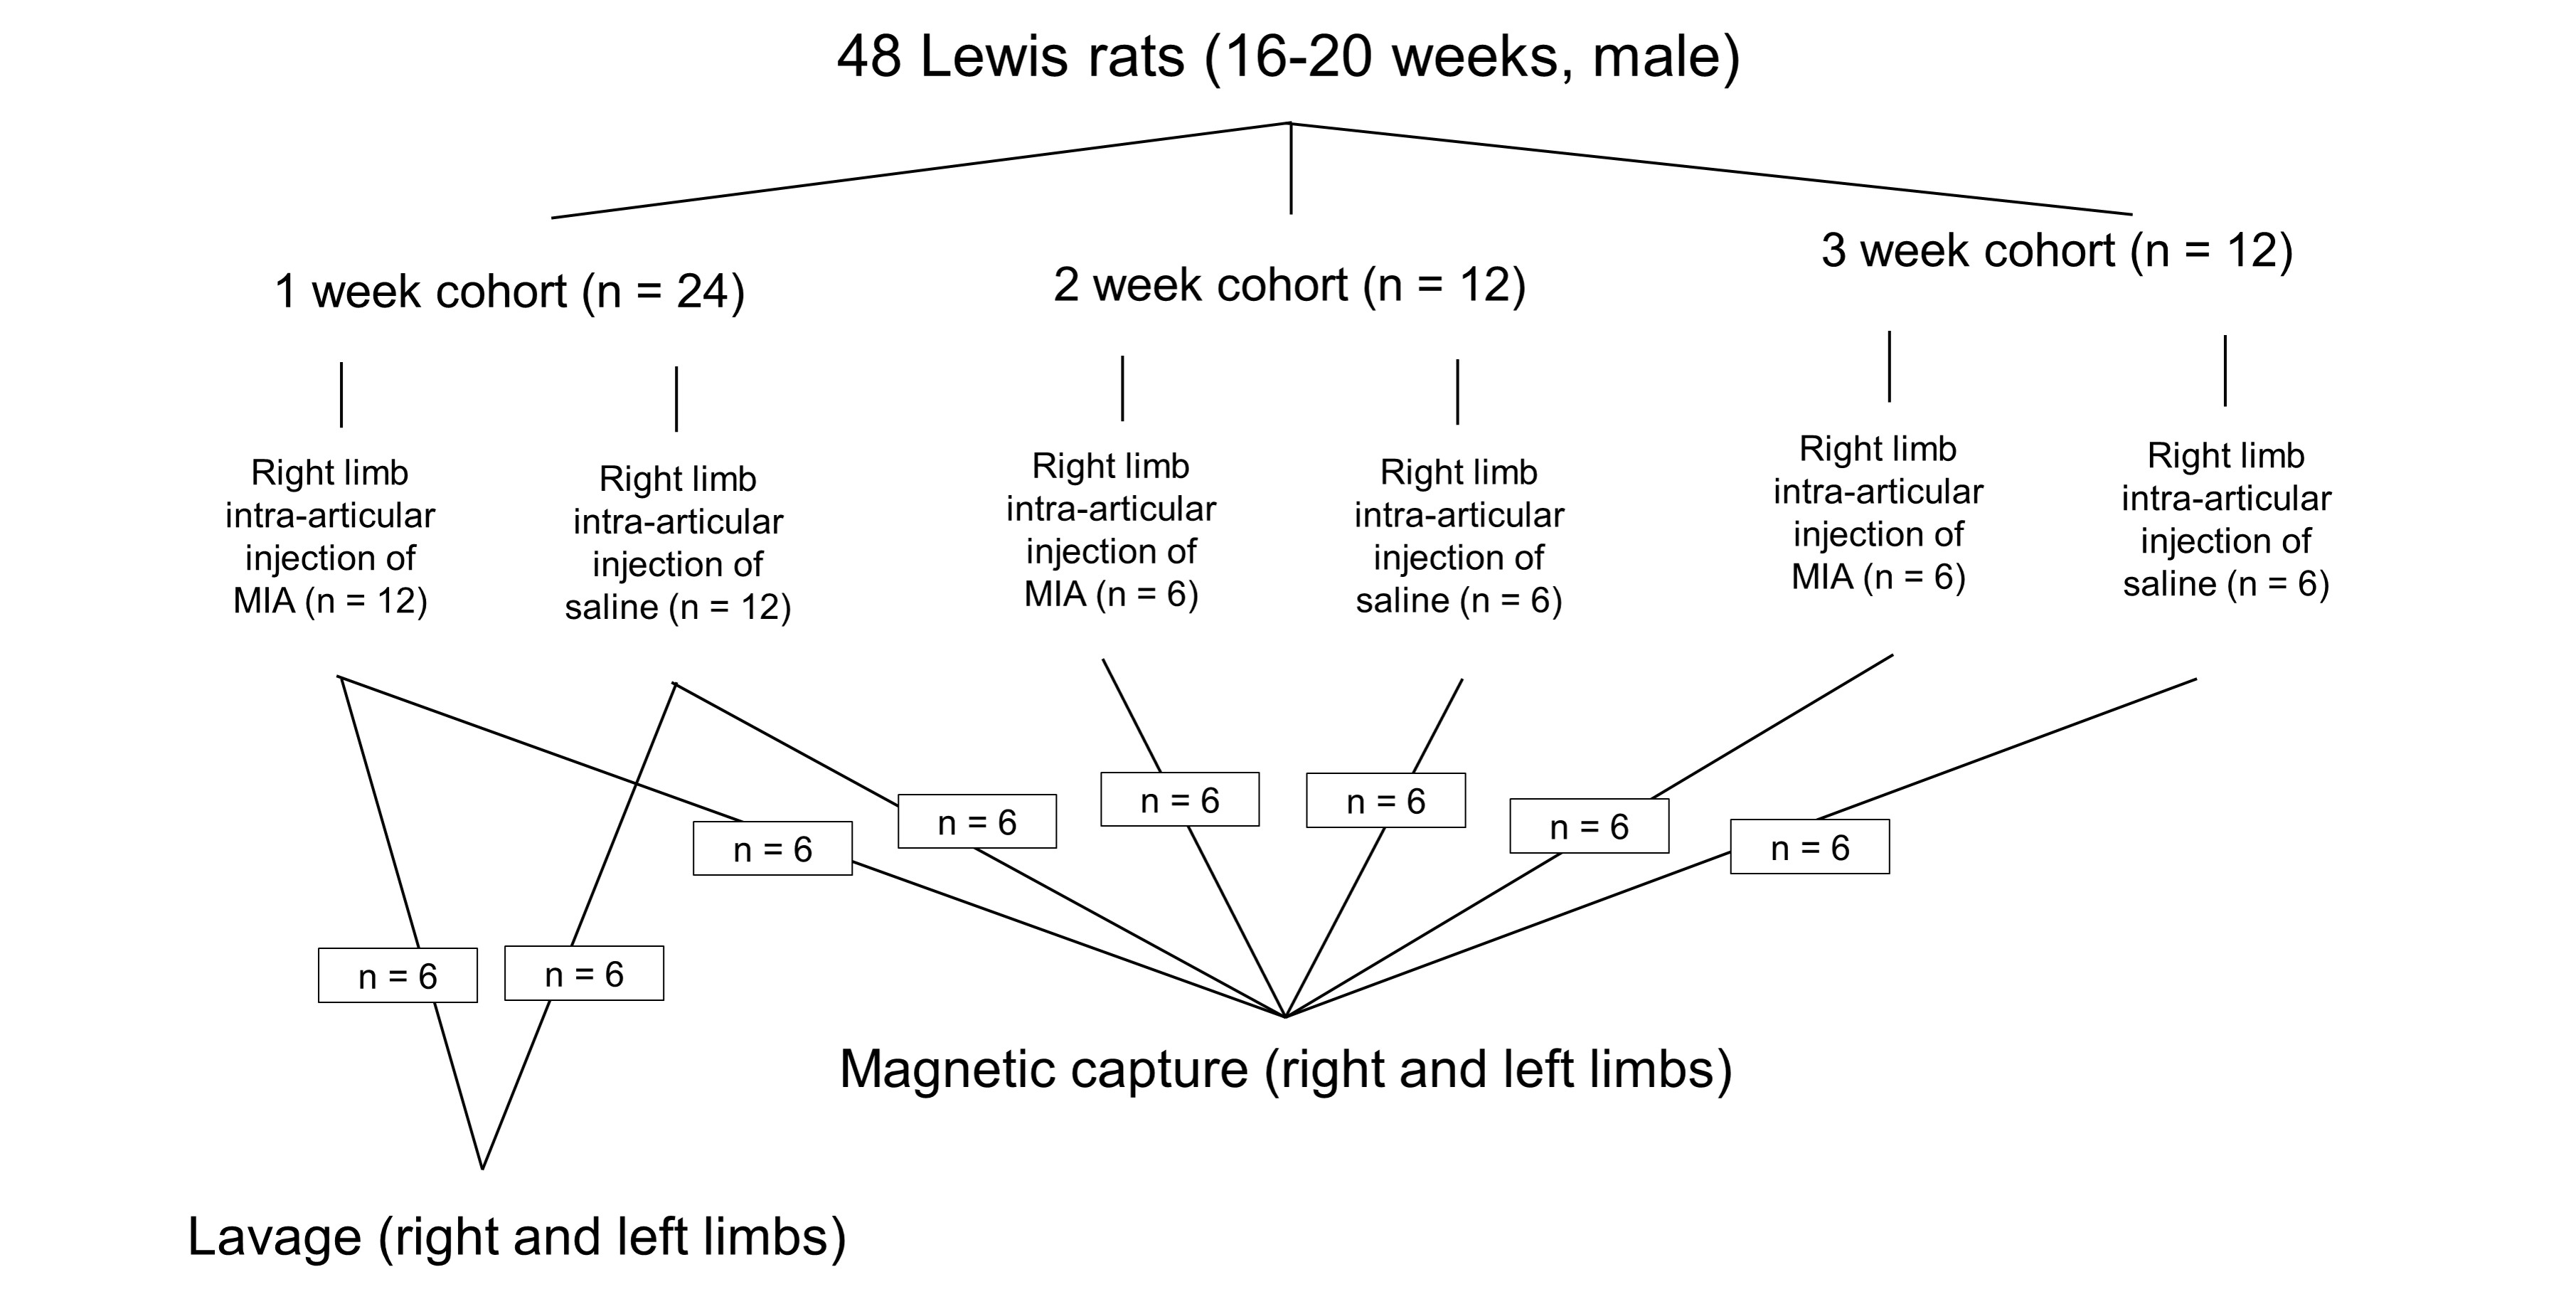

Supplement: Supplementary file 1 [file 1 › icts_a_1620223_sm9227.jpg]
